# Supplementary material for: Retention of selenium by calcium aluminate hydrate (AFm) phases under strongly-reducing radioactive waste repository conditions
Source: Royal Society of Chemistry journal article supplement (doi:10.1039/c7dt04824f), 2018-01-01
Supplement: c7dt04824f1.pdf [file c7dt04824f1.pdf]

Supplementary information for the manuscript entitled:

**Retentium of selenium by calcium aluminate hydrate (AFm) phases under  
strongly-reducing radioactive waste repository conditions**

H. Rojo<sup>a, b</sup>, A.C. Scheinost<sup>c\*</sup>, B. Lothenbach<sup>d</sup>, A. Laube<sup>a</sup> E. Wieland<sup>a</sup>, J. Tits<sup>a\*</sup>

<sup>a</sup> Paul Scherrer Institut, Laboratory for Waste Management, 5232 Villigen-PSI, Switzerland

<sup>b</sup> Institute for Nuclear Waste Disposal, Karlsruhe Institute of Technology, Karlsruhe, Germany

<sup>c</sup> Institute of Resource Ecology, Helmholtz-Zentrum Dresden-Rossendorf, Dresden, Germany

<sup>d</sup> Laboratory for Concrete and Construction Chemistry, Empa, Dübendorf, Switzerland

Corresponding authors: Jan Tits: Email: [jan.tits@psi.ch](mailto:jan.tits@psi.ch)

Andreas C. Scheinost: Email: [Scheinost@esrf.fr](mailto:Scheinost@esrf.fr)

Contents: 6 pages, 5 figures.

## 1. Redox speciation of selenium under alkaline conditions

Predominance diagrams in the pH range  $10 < \text{pH} < 14$  show that the selenium speciation is dominated by Se(IV) under moderately reducing conditions, whereas Se(0),  $\text{Se}_x^{2-}$  ( $x=2, 3, 4$ ) and  $\text{HSe}^-$  dominate the redox speciation under strongly reducing conditions.<sup>1</sup>

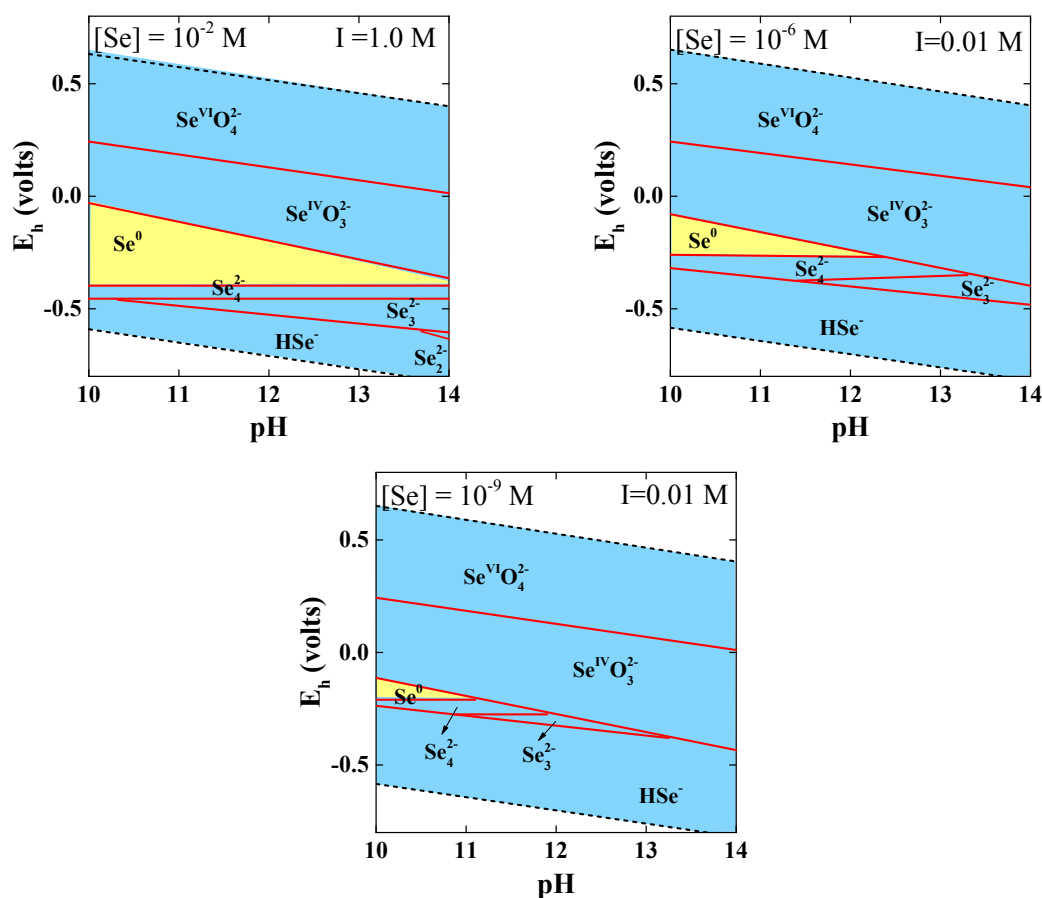

**Figure S1:** Predominance diagrams of Se in the pH and  $E_h$  regions relevant for the cementitious near field of a low- and intermediate level nuclear waste repository, calculated for three different total Se concentrations. Calculations were performed using the code Medusa<sup>2</sup> with thermodynamic data for Se included in the NEA thermodynamic database<sup>1</sup> considering three total Se concentrations:  $[\text{Se}] = 10^{-2} \text{ M}$ ,  $10^{-6} \text{ M}$  and  $10^{-9} \text{ M}$ .

## 2. Reduction of Se(IV) to Se(-II)

$\text{NaHSe}$  (Se(-II)) solutions were obtained by electrochemical reduction of  $10^{-2} \text{ M}$   $\text{Na}_2\text{SeO}_3$  (Se(IV)) solutions in  $1.0 \text{ M}$   $\text{NaOH}$ , with the help of a standard three electrode electrochemical cell coupled with a VMP3 multichannel potentiostat (Bio-Logic, France) in constant potential mode ( $E_h = -1.29 \text{ V}$  (SHE)). Hyperalkaline conditions ( $\text{pH} \geq 14$ ) were applied to avoid precipitation of Se(0) which is considerably slowing down the reduction. The risk for alkaline glass corrosion under such harsh experimental conditions excludes the use of materials made of glass and ceramic frits in the electrochemical cells. Furthermore, special leak-free reference electrodes need to be employed to avoid  $\text{AgO}$  precipitation. The electrochemical cell consists of a home-made polyacryl container, a high surface area reticulated vitreous carbon (RVC)

working electrode (BASi, USA), a platinum (Pt) wire as counter electrode (BASi, USA) and a leak-free Ag/AgCl reference electrode embedded in peek (eDAQ, Australia) (Figure 1a and b). The counter electrode was kept isolated from the cell solution in a separate compartment made of polyacryl, within the electrochemical cell (Figure 1b). Electrical contact was made through an alkali-resistant perfluorinated cation-exchange membrane (Nafion® 117, DuPont, USA)<sup>7</sup>.

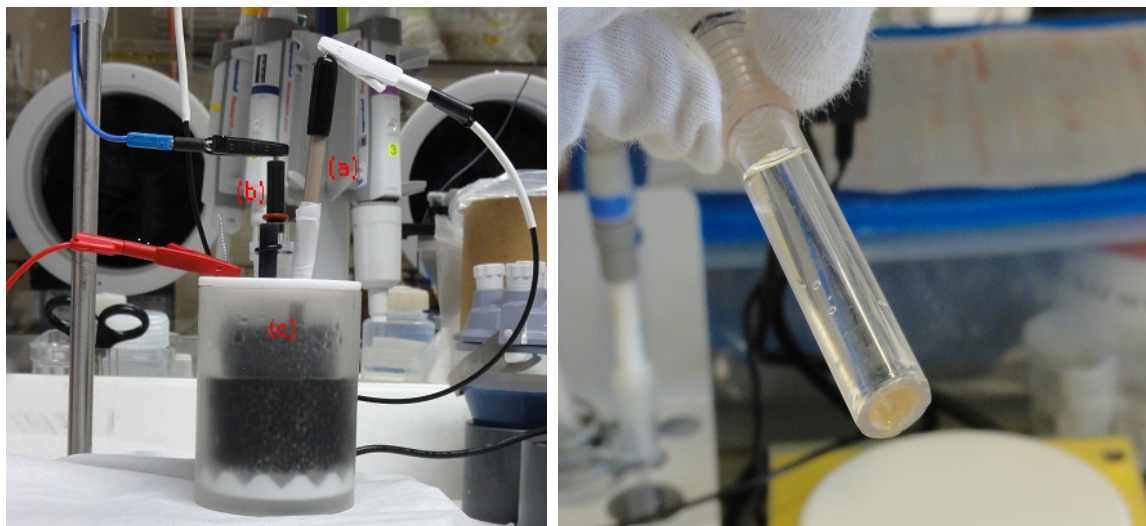

**Figure S2.** Left: Electrochemical cell with (a) leak-free reference electrode, (b) auxiliary electrode and (c) reticulated vitreous carbon electrode (black material in the poly-acrylic container). Right: Detailed image of polyacryl compartment with Nafion membrane, containing the auxiliary electrode.

UV-Vis spectrometry (Cary 6000i, Agilent Technologies, Santa Clara, USA) allows identification of the reduced Se species ( $\text{HSe}^-$  and  $\text{Se}_x^{2-}$ ) in solution and was used to follow the evolution of the reduction process and to confirm the completeness of the reduction reaction (Figure S3 and S4).  $\text{HSe}^-$  and a series of polyselenides absorb strongly in the near-UV region whereas  $\text{Se}(0)$ ,  $\text{SeO}_3^{2-}$  and  $\text{SeO}_4^{2-}$  lack any absorbance. The spectral characteristics and the absorbance maxima of the reduced Se species are listed in a paper by Licht and Forouzan<sup>3</sup>. UV-Vis spectra were recorded using Hellma Suprasil™ quartz cuvettes with a path length of 1.0 cm. Absorbances were recorded using single wavelength scans between 230 nm and 550 nm at a scan rate of 600 nm/min, a wavelength interval of 0.5 nm and a spectral band width of 2 nm.

UV-Vis spectra recorded during the reduction process showed that the formation of  $\text{HSe}^-$  (peak max. at a wavelength,  $\lambda = 245$  nm) is preceded by the appearance of different polyselenides ( $\text{Se}_4^{2-}$ ,  $\text{Se}_3^{2-}$  and  $\text{Se}_2^{2-}$ ) accompanied by clear changes in the colour of the solution (Figure S3 and S4). The colourless  $\text{Se}(\text{IV})$  solution turns orange /red indicating increasing amounts of polyselenide species, and returns to a colourless solution when all Se is reduced to  $\text{HSe}^-$ . Figure S3 includes UV-Vis spectra after 1 day, 2 days and 5 days reduction.

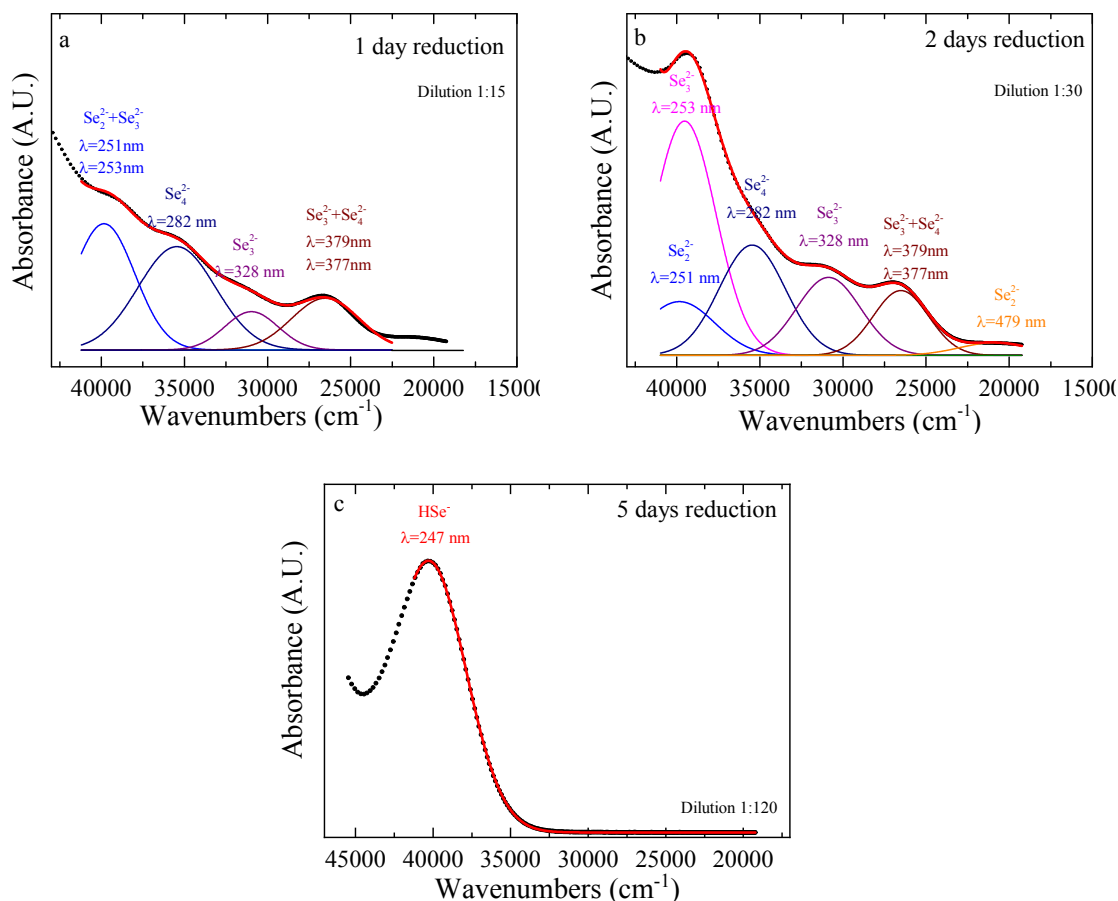

**Figure S3.** UV-Vis spectra at different stages of the Se(IV) to Se(-II) reduction process in 1 M NaOH.  $[\text{Se}_{\text{tot}}] = 10^{-2}$  M. a) Sample after 1 day reduction. b) sample after 2 days reduction. c) sample after 5 days reduction

This reduction process is accompanied by clear changes in the colour of the solution: (Figure S4).

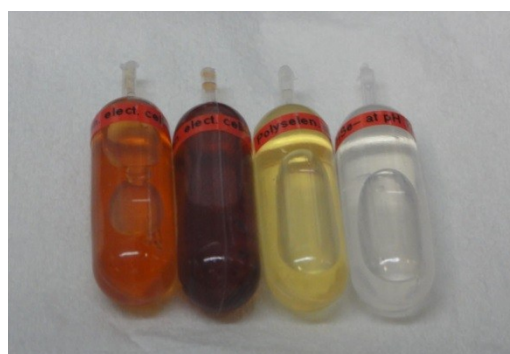

**Figure S4.** Aliquots of Se solution during the reduction process. The colour of the solution indicates the stage of the process.

### 3. Stabilisation of the selenium redox state with hydrazine ( $\text{N}_2\text{H}_4$ )

To stabilize Se in the (-II) redox state,  $10^{-2}$  M hydrazine ( $\text{N}_2\text{H}_4$ ) was added to all experiments to preserve reducing conditions<sup>4, 5</sup>.  $\text{N}_2\text{H}_4$  is a strong reducing agent as reflected by the reduction potential for the following reaction in basic solution<sup>6</sup>:

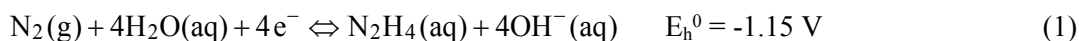

#### 4. Se redox speciation and oxidation kinetics

Thermodynamic calculations indicate that a  $10^{-2} \text{ M}$   $\text{N}_2\text{H}_4$  solution in  $0.01 \text{ M}$   $\text{NaOH}$  in equilibrium with a glovebox atmosphere containing  $1 \text{ atm}$   $\text{N}_2$  should provide a redox potential ( $E_h$ ) of  $\sim -1.0 \text{ V}$ , well within the stability field of  $\text{HSe}^-$  (Figure S1). Preliminary test experiments, however, revealed that a hydrazine concentration of  $10^{-2} \text{ M}$  is not capable of completely stabilizing the  $-II$  redox state of Se in a  $10^{-3} \text{ M}$   $\text{HSe}^-$  solution in  $0.01 \text{ M}$   $\text{NaOH}$ . The measured  $E_h$  values in this solution were found to be  $-0.51 \pm 0.03 \text{ V}$  (SHE) which is well above the theoretical value of  $-1.0 \text{ V}$  assuming that the redox couple  $\text{N}_2/\text{N}_2\text{H}_4$  would control the  $E_h$  in the system, but still within the theoretical stability field for  $\text{HSe}^-$ . The redox potential was found to remain constant over a period of 18 days. UV-Vis spectra, however, show that the measures taken to prevent oxidation (i.e., inert atmosphere with  $\text{O}_2$  concentrations below  $0.1 \text{ ppm}$  and addition of  $10^{-2} \text{ M}$  hydrazine) were not sufficient to suppress Se(-II) oxidation completely over a time period of 18 days (Figure 6a). This is in contrast to the observations made by Landesmann et al.<sup>7</sup>. Note however that the latter authors only verified the redox potential to confirm the  $-II$  redox state of Se. The UV-Vis spectra shown in Figure 6 further suggest that the fraction of Se oxidized depends on the total  $\text{HSe}^-$  concentration in solution:

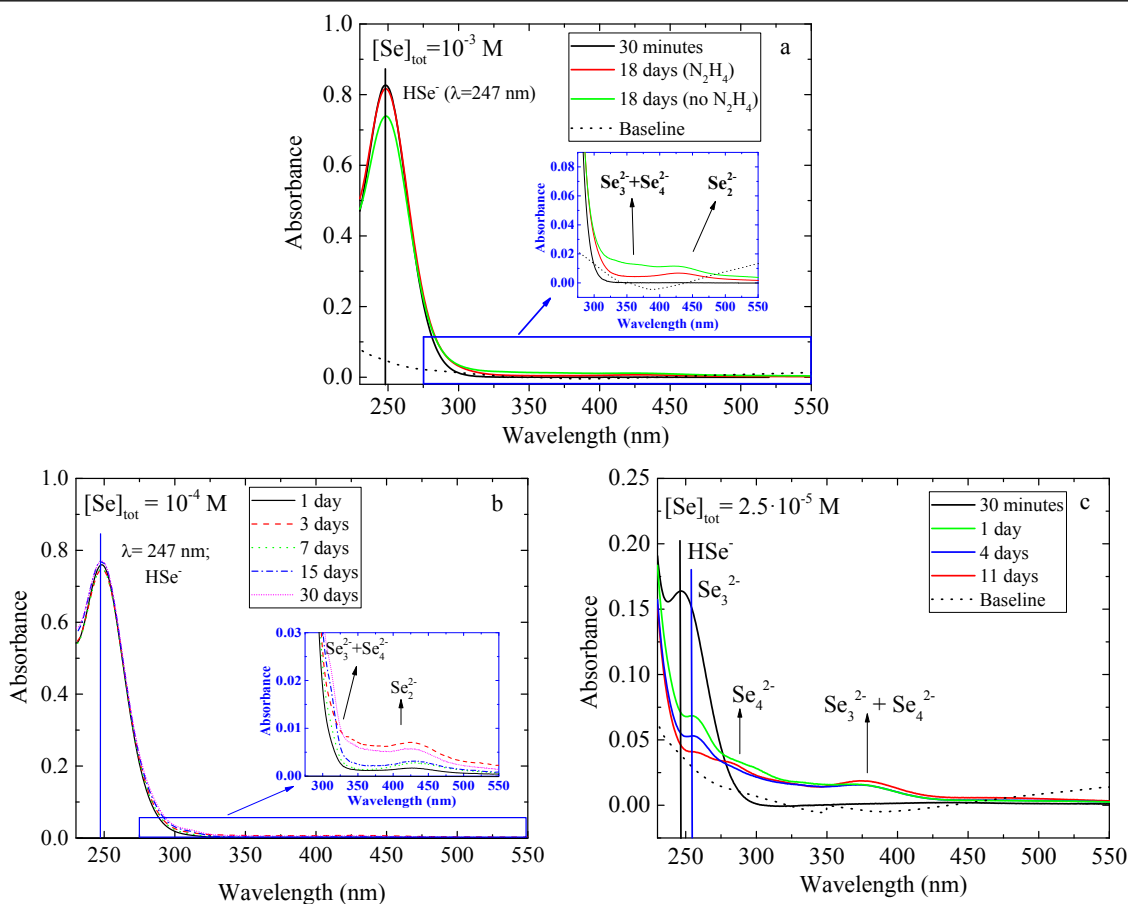

**Figure S5:** Oxidation kinetics of Se(-II) solutions in 0.01 M NaOH in the presence of  $10^{-2}$  M  $\text{N}_2\text{H}_4$  (except when specified in the figure). Dependence on  $[\text{Se}]_{\text{tot}}$ . a) Dilution factor = 10. b) Dilution factor = 1. c) Dilution factor = 1. Baselines are added as a reference. All spectra are baseline-corrected.

$\text{HSe}^-$  solutions containing  $10^{-3}$  M  $\text{HSe}^-$  or  $10^{-4}$  M  $\text{HSe}^-$  show only minimal oxidation after 18 days and 30 days equilibration in the glove box with only very small polyselenide bands visible in the wavelength range  $250 \text{ nm} < \lambda < 550 \text{ nm}$ . In a  $2.5 \cdot 10^{-5}$  M  $\text{HSe}^-$  solution, virtually all the  $\text{HSe}^-$  has been oxidized after 11 days equilibration in the glovebox and the UV-Vis spectrum is dominated by polyselenide bands. The absorbance of the polyselenide peaks is however too weak to allow quantification. Note that the UV-Vis spectra do not provide information about the amounts of  $\text{Se}(0)$  and  $\text{SeO}_3^{2-}$  formed as these redox species do not absorb light in the UV-Vis region.  $E_h$  values measured in the  $10^{-3}$  M  $\text{HSe}^-$  solution in 0.1 M NaOH remained constant at a value of  $-0.51 \pm 0.03$  V (SHE) over the entire observation period whereas the  $E_h$  value of the  $2.5 \cdot 10^{-5}$  M  $\text{HSe}^-$  solution decreased from a value of  $-0.41$  V (SHE) after 1 day to  $-0.27$  V (SHE) after 11 days indicating the measured redox potential is controlled by Se redox species and not by  $\text{N}_2\text{H}_4$  and providing further evidence that Se oxidation has taken place. The present oxidation tests thus show that solutions containing  $\text{HSe}^-$  concentrations below  $10^{-4}$  M under alkaline conditions are very sensitive to oxidation even though extensive precautions were taken to reduce the presence of oxygen to a minimum.

## References

1. Å. Olin, B. Nöläng, E. G. Osadchii, L.-O. Öhman and E. Rosén, *Chemical Thermodynamics of Selenium*, Elsevier, Amsterdam, 2005.
2. I. Puigdomenech, 1983. INPUT, SED, and PREDOM: Computer Programs Drawing Equilibrium Diagrams; TRITA-OKK-3010. Royal Institute of Technology (KTH), Dept. Inorg. Chemistry, Stockholm (Sweden).
3. S. Licht and F. Forouzan, *J. Electrochem. Soc.*, 1995, **142**, 1546-1551.
4. Y. Iida, T. Tanaka, T. Yamaguchi and S. Nakayama, *J. Nuclear Sci. Technol.*, 2011, **48**, 279 - 291.
5. Y. Iida, T. Yamaguchi, T. Tanaka and S. Nakayama, *J. Nuclear Sci. Technol.*, 2010, **47**, 431 - 438.
6. S. G. Bratsch, *J. Phys. Chem. Ref. Data*, 1989, **18**, 1-21.
7. C. Landesmann, C. Bailly, V. Baty, J. Vandenborre and B. Grambow, 4<sup>th</sup> Annual Workshop Proceedings, 7<sup>th</sup> EC FP - Recosy CP, Karlsruhe, Germany, 23 - 26 January, 2012.
